# Supplementary material
Source: Springer Nature journal article supplement (https://www.springermedizin.de/resource/supplementary/12937_2007_203_MOESM1_ESM.pdf/25654710)
Supplement: MOESM1 [file 25654710]

Low- GI diets and  
metabolic syndrome

↓ Insulin resistance

↓  $\beta$ -cell dysfunction

↓ Hyperinsulinaemia

↓ Glycaemia

↓ Free fatty acids

↓ Dyslipidaemia

↓ Inflammation

↓ Endothelial  
dysfunction

↓ Prothrombotic  
factors

↓ Cardio-vascular risk
